# Supplementary material
Source: Research Square preprint supplement (doi:10.21203/rs.3.rs-10262399/v1)
Supplement: Supplementary file 1 [file 2ecc688672ea97bb1f8984d3.xlsx]

## Sheet: YEARS survey questionnaire
YEARS survey questionnaire
No.	Questionnaire	Response list
1	How old are you?	24 - 29	30-34	35 - 39	40-44	≥45
2	What is your gender?	Female	Male	Other (specify)
3	In what country do you work?	select contry
4	Where do you work?	Tertiary University Hospital	Private Hospital	Tertiary center non-university	Primary or secondary center
5	Type your hospital’s name	descriptive
6	What is your Gynecological subspecialty or area of interest?	Urogynaecology	Benign gynaecology (abnormal uterine bleeding, fibroids, endometrioisis,…)	Oncological Gynecology	Other (specify)
7	Does your country have a structured fellowship program for your area of interest?	Yes	No
8	What is your level of experience within your current role?	Currently, I am enrolled in a specialty training program/residency in obstetrics and gynaecology	Currently, I am in the first half of a post-graduate fellowship/training program	Currently, I am in the second half of a post-graduate fellowship/training program	Currently, I am in a non-training position	I have finished a training program and am working as a consultant	I haven’t done any training program
9	Are (or were) you enrolled in a sub-specialty structured training program?	My training program is (or was) a structured fellowship	My training program is (or was) a non-structured fellowship	I am (or was) not enrolled in any training program	Other (specify)
10	If you have finished your post-graduate/subspecialty training, are you working in your area of interest?	Yes, I am working according to my completed training program	No, I am working in other competencies	Other (please specify)
11	Is there a surgical robotic device at your workplace?	Yes	No
12	When did your department start to perform robotic surgery? Type the year	descriptive
13	What kind of training have you had regarding ROBOTIC SURGERY	None	Industry course	National or international society course	Local hospital course	Fellowship or subspeciality training	Other (please specify)
14	Which robotic device do you use (more than one answer possible)	Da Vinci Si (Intuitive)	Da Vinci X(Intuitive)	Da Vinci Xi (Intuitive)	Hugo (Medtronic)	Versius (CMR)	Hominis (Surgical Science)	Other (please specify)
15	How often does your department perform robotic surgery?	> 1 day per week	1 day per week	1 day every 2 weeks	< 1 day every 2 weeks	Never
16	Is your department currently involved in robotics research?	No and it has never been	No but it was in the past	Yes, in retrospective studies	Yes, in prospective studies
17	How many abdominal/pelvic surgeries (average) does your department perform per year by any approach?	descriptive
18	How many surgeries (average) does your department perform per year by robotic approach?	descriptive
19	Do you operate as a main surgeon by robotic approach?	> 1 day per week	1 day per week	1 day every 2 weeks	< 1 day every 2 weeks	<1 day per month	No
20	Would you like to operate more often by a robotic approach?	No, I am happy with my frequency as main surgeon	Yes, I would like to operate as a main surgeon more often	Yes, I would like to initiate of performing surgeries as a main surgeon
21	Which is the main activity performed by robotics in your department (more than one is possible)	Benign surgery (endometriosis, fibroids, fertility surgery…)	Gynaecological Oncology	Urogynaecology	Breast surgery
22	Which is the main procedure that you perform as a main surgeon by robotics?	Benign Hysterectomy	Adnexectomy	Endometriosis resection	Malignant Hysterectomy + lymph node assessment (SLNB or lymphadenectomy)	Cytoreduction	Colposacropexy/colposuspension	Other (specify)
23	Regarding the last question, how do you feel more confident to perform as a main surgeon?	Open surgery	Laparoscopic	Robotic	I do not have enough experience yet
24	Do you feel confident in performing a main procedure of your subspecialty?	Not yet, I feel I need to assist more cases as first assistant	Not yet, I feel I need to assist more cases as second assistant (I do not feel confident as first assistant	yet)	Yes, assisted by a consultant	Yes, assisted by fellows/residents with direct supervision of the consultant in the operating room	Yes, without any supervision
25	What learning tools do you access most frequently about robotics (more than one allowed)?	Dedicated robotic on-site courses	Webinars	Society websites	You Tube	Social Media	Other (please specify)
26	Would you like to do a short-observership in order to learn more about robotic surgery?	Extremely interested	Powered by	See how easy it is to create surveys and forms.	Privacy & Cookie Notice	Very interested	Somewhat interested	Not so interested	Not at all interested
27	How do you define access to robotic learning tools: didactic training, courses, videos etc.?	Easy access, there is a lot of information available	Moderate access, there is not enough information available	Difficult access, there is very limited content available about robotic surgery
28	Please let us know any commnets you have	descriptive

## Sheet: JSGRS survey questionnaire
JSGRS survey questionnaire
No.	Questionnaire	Response list
Characteristic
1	How many years after graduated?	descriptive
2	What is your gender?	Female	Male	Others
3	What is your subspecialty?	Perinatal and Neonatal medicine Gynecologic Oncology	Reproductive Endocrinology	Menopause and Women's Health General OB/Gyn	Others
4	Which type of facility do you work?	Educational institution	Regional Central Hospital	Regional Community Hospital	Clinic	Others
5	Which region do you practice at?	None/Others	Hokkaido	Tohoku	Kanto	Chubu	Kinki	Chugoku	Shikoku	Kyushu/Okinawa
6	Annual number of laparoscopic surgeries as a surgeon	< 20 cases	21–50 cases	51–100 cases	> 100 cases
7	Installation status of robotic surgical systems at the facility	Not installed	Installed
8	Annual number of robotic surgeries at the facility	None/unknown	1–50 cases	51–100 cases	> 100 cases
9	Respondent’s robotic surgery certification status	Not acquired	Assistant qualification	Surgeon qualification	Certified as a proctor
10	Robotic experience as a primary surgeon	None	Only assistant	1–10 cases	11–50 cases 51–100 cases	> 100 cases
Perceptions of robotic surgery
11	Do you think further adoption and expansion of gynecologic robotic surgery are necessary?	Neutral/ Not sure	Strongly disagree	Somewhat disagree	Somewhat agree	Strongly agree
12	Do you think the indications for robotic surgery should be expanded for benign gynecologic conditions in the future? (e.g., myomectomy or benign ovarian tumors)	Neutral/ Not sure	Strongly disagree	Somewhat disagree	Somewhat agree	Strongly agree
13	Do you think the indications for robotic surgery should be expanded for malignant gynecologic conditions in the future? (e.g., ovarian cancer, cervical cancer, or lymph node dissection in initial surgery)	Neutral/ Not sure	Strongly disagree	Somewhat disagree	Somewhat agree	Strongly agree
14	Do you think it is necessary for robotic surgery in gynecology to be available at as many facilities as possible?	Neutral/ Not sure	Strongly disagree	Somewhat disagree	Somewhat agree	Strongly agree
15	Do you think there is a need for centralization of gynecologic robotic surgery to specialized centers in the future?	Neutral/ Not sure	Strongly disagree	Somewhat disagree	Somewhat agree	Strongly agree
16	Do you personally want to be involved in gynecologic robotic surgery?	Neutral/ Not sure	Strongly disagree	Somewhat disagree	Somewhat agree	Strongly agree
17	Do you think gynecologic robotic surgery for benign conditions benefits patients?	Neutral/ Not sure	Strongly disagree	Somewhat disagree	Somewhat agree	Strongly agree
18	Do you think gynecologic robotic surgery for malignant conditions benefits patients?	Neutral/ Not sure	Strongly disagree	Somewhat disagree	Somewhat agree	Strongly agree
Barriers to adoption and skill acquisition
19	Do you think healthcare economics are a barrier to the widespread adoption of robotic surgery? (e.g., introduction costs or limitations in medical resources)	Neutral/ Not sure	Strongly disagree	Somewhat disagree	Somewhat agree	Strongly agree
20	Do you think ethical issues are a barrier to the widespread adoption of robotic surgery? (e.g., patient acceptance or understanding among medical professionals)	Neutral/ Not sure	Strongly disagree	Somewhat disagree	Somewhat agree	Strongly agree
21	Do you think the number of individual case experiences is a barrier to acquiring robotic surgery skills?	Neutral/ Not sure	Strongly disagree	Somewhat disagree	Somewhat agree	Strongly agree
22	Do you think institutional background is a barrier to acquiring robotic surgery skills?	Neutral/ Not sure	Strongly disagree	Somewhat disagree	Somewhat agree	Strongly agree
Education in Robotic Surgery
23	Do you think robotic surgery offers benefits for medical education and training?	Neutral/ Not sure	Strongly disagree	Somewhat disagree	Somewhat agree	Strongly agree
24	Do you think some form of training program for acquiring robotic surgery skills is necessary in OB/Gyn residency programs?	Neutral/ Not sure	Strongly disagree	Somewhat disagree	Somewhat agree	Strongly agree
25	Do you think online education is effective for acquiring robotic surgery skills?	Neutral/ Not sure	Strongly disagree	Somewhat disagree	Somewhat agree	Strongly agree
26	Which of the following best describes your view on the approach to learning robotic surgery skills?	Not sure	Open surgery should be learned first	Laparoscopic surgery should be learned first	Robotic surgery should be learned first	Open, laparoscopic, and robotic surgery should be learned in parallel	The order of learning does not matter
