# Supplementary material
Source: Research Square preprint supplement (doi:10.21203/rs.3.rs-10262399/v1)
Supplement: Supplementary file 2 [file 91f0761e3358c6bc78dce238.xlsx]

## Sheet: Table.1
	Similar questionnaires between the YEARS and JSGRS surveys
	Topic	YEARS	JSGRS
	Gender	What is your gender?	What is your gender?
	Area of Interest / Subspecialty	What is your Gynecological subspecialty or area of interest?	What is your subspecialty?
	Facility	Where do you work?	Which type of facility do you work?
	Level of experience	What is your level of experience within your current role?	How many years after graduated?
	Availability of Robotic Devices	Is there a surgical robotic device at your workplace?	Installation status of robotic surgical systems at the facility
	Departmental Robotic Surgery Activity	How often does your department perform robotic surgery?	Annual number of robotic surgeries at the facility
	Experience as a Robotic Surgeon	Do you operate as a main surgeon by robotic approach?	Robotic experience as a primary surgeon
	Willingness to Perform Robotic Surgery	Would you like to operate more often by a robotic approach?	Do you personally want to be involved in gynecologic robotic surgery?
	Learning Opportunities	What learning tools do you access most frequently about robotics (more than one allowed)?	Do you think online education is effective for acquiring robotic surgery skills?

## Sheet: Table.2
	Characteristics of respondents and their comparison
	YEARS (n=81)	n	(%)	JSGRS (n=212)	n	(%)	p-value
	What is your gender?			What is your gender?
	Female	44	0.543	Female	119	0.561	n.s
	Male	37	0.457	Male	90	0.425
				Prefer not to say	3	0.014
	What is your Gynecological subspecialty or area of interest?			What is your subspecialty?
	Gynecology Oncology	57	0.704	Gynecology Oncology	116	0.547	n.s
	Benign gynecology	18	0.222	General gynecology	62	0.292
	Urogynecology	6	0.074	Women's Healthcare	27	0.127
				Other	7	0.033
	Where do you work? (Among 63 responders from where robotic device available)			Which type of facility do you work?
	Tertiary University Hospital	47	0.746	Tertiary University Hospital	91	0.429	***
	Tertiary No-University Center	9	0.142	Tertiary No-University Center	110	0.519
	Private Hospital	7	0.111	Private Hospital	7	0.033
				Others	4	0.019
	What is your level of experience within your current role?			How many years after graduated? (<12Y)
	Currently, doing training program in gyn/obs	16	0.198	Residency (-5Y)	38	0.179	***
	Currently, 1/2 half of fellowship	12	0.148	Fellowship (5Y- without subspeciality)	101	0.476
	Currently, 2/2 half of fellowship	5	0.062	Consultant (5Y- with certification of subspeciallty)	32	0.151
	Working as a consultant < 4 years	43	0.531	Other (5Y-, doing general)	41	0.193
	Others	5	0.062
	Is there a surgical robotic device at your workplace?			Installation status of robotic surgical systems at the facility
	Yes	63	0.778	Yes	157	0.741	n.s
	No	18	0.222	No	55	0.259
	How often does your department perform robotic surgery?			Annual number of robotic surgeries at the facility (Case/ Year)
	> 1 day per week	32	0.395	151-	5	0.024	***		27.3726
	1 day per week	21	0.259	101-150	12	0.057
	< 1 day per week	10	0.123	51-100	41	0.193
	Never	18	0.222	11-50	72	0.34			39.6226
				1-10	12	0.057
				Never	60	0.283			28.3019
				Not well known	10	0.047			4.71698
	Do you operate as a main surgeon by robotic approach?			Robotic experience as a primary surgeon (Case so far)
	< 1 day per week	39	0.481	101-150	2	0.009	NA
	1 day per week	15	0.185	51-100	6	0.028
	> 1 day per week	8	0.099	11-50	28	0.132
	No device	18	0.222	1-10	17	0.08
	NA	1	0.012	Never	159	0.75
	Would you like to operate more often by a robotic approach? (Among 63 responders)			Do you personally want to be involved in gynecologic robotic surgery?
	No, I am happy with my frequency	11	17.5%	strongly agree	67	0.316	NA
	I would like to operate more often as a main surgeon	35	55.6%	slightly agree	82	0.387
	I would like to initiate surgeries as a main surgeon	16	25.4%	not sure	6	0.028
	NA	1	1.5%	slightly disagree	38	0.179
				strongly disagree	19	0.09
	What learning tools do you access most frequently about robotics (more than one allowed)?			Do you think online education is effective for acquiring robotic surgery skills?
	On-site courses	34	0.42	strongly agree	53	0.25	NA
	Webinars	40	0.494	slightly agree	116	0.547
	Society websites	27	0.333	not sure	13	0.0613
	Social media	12	0.148	slightly disagree	27	0.127
				strongly disagree	3	0.014
	NA: not applicable, n.s: not significant, ***p<0.001
